# Supplementary material for: Detection of M2-Type Anti-Mitochondrial Autoantibodies against Specific Subunits in the Diagnosis of Primary Biliary Cholangitis in Patients with Discordant Results
Source: MDPI journal article supplement (doi:10.3390/diagnostics13111840), 2023-05-24
Supplement: s1 [file s1]

**Supplementary Table S1.** Immunological and clinical data of all studied patients

| Group/<br>Patient | AMA-M2 IFA<br>(titer)              | ELISA<br>(U/mL) | DB-E2nonSep |                           | DB-E2sep |        |           |         | ALP      | Biopsy                                 | Diagnosis                                                            | Comments                                                     |
|-------------------|------------------------------------|-----------------|-------------|---------------------------|----------|--------|-----------|---------|----------|----------------------------------------|----------------------------------------------------------------------|--------------------------------------------------------------|
|                   |                                    |                 | 3E2         | nAg<br>(mainly<br>PDC-E2) | nPDC     | PDC-E2 | BCOADC-E2 | OGDC-E2 |          |                                        |                                                                      |                                                              |
| A/1               | Negative                           | 22.8            | 73+++       | 2 o                       | -        | -      | -         | -       | Elevated | Yes (compatible with PBC)              | PBC                                                                  | Probable systemic<br>lupus erythematosus                     |
| A/2               | Negative                           | 57              | 24+         | 1 o                       | -        | +      | -         | -       | Normal   | No                                     | Not PBC criteria<br>(Metabolic<br>associated fatty liver<br>disease) |                                                              |
| A/3               | Negative                           | 44              | 29+         | 1 o                       | -        | +      | -         | -       | Elevated | Yes (compatible with PBC)              | PBC                                                                  | Elevated<br>GGT/cirrhosis                                    |
| A/4               | Negative                           | 46.2            | 36++        | 3 o                       | -        | +      | -         | -       | Normal   | Yes (compatible with AIH)              | AIH                                                                  |                                                              |
| A/5               | Negative                           | 26.8            | 47++        | 10 (+)                    | -        | +      | -         | -       | Normal   | Yes (compatible with AIH)              | AIH                                                                  | Cirrhosis                                                    |
| A/6               | Negative                           | 66.1            | 38++        | 2 o                       | -        | -      | ++        | -       | Normal   | No                                     | Not PBC criteria<br>(Alcoholic and<br>MAFLD cirrhosis)               |                                                              |
| A/7               | Negative                           | 77.4            | 45++        | 7 o                       | -        | -      | ++        | -       | Normal   | Yes (compatible with AIH)              | AIH                                                                  |                                                              |
| A/8               | Negative                           | 70.4            | 29+         | 2 o                       | -        | -      | ++        | -       | Elevated | No (due to patient's<br>comorbidities) | Not PBC criteria                                                     |                                                              |
| A/9               | Negative                           | 58.5            | 40++        | 4 o                       | -        | -      | +         | -       | Normal   | Yes (compatible with AIH)              | AIH                                                                  |                                                              |
| A/10              | Negative                           | 78.6            | 66++        | 3 o                       | -        | -      | ++        | -       | Elevated | No                                     | PBC                                                                  | Positive anti-gp210<br>autoantibodies                        |
| A/11              | Negative                           | 104.9           | 40++        | 4 o                       | -        | -      | ++        | -       | Elevated | No (lost to follow-up)                 | Probable PBC (lost<br>to follow-up)                                  |                                                              |
| A/12              | Negative                           | 116.9           | 38++        | 2 o                       | -        | -      | ++        | -       | Elevated | Yes (compatible with PBC<br>and AIH)   | PBC+AIH                                                              |                                                              |
| A/13              | Negative                           | 41.1            | 38++        | 2 o                       | +        | +      | +         | -       | Elevated | No (patient's refusal)                 | Not PBC criteria<br>(Unclear)                                        | Elevated GGT and<br>poor response to<br>ursodeoxycholic acid |
| A/14              | Negative                           | 71.2            | 40++        | 2 o                       | +        | +      | +         | -       | Normal   | No                                     | Not PBC criteria                                                     |                                                              |
| A/15              | Negative                           | 62.1            | 99+++       | 18+                       | +        | -      | -         | +       | Normal   | No                                     | Not PBC criteria                                                     |                                                              |
| A/16              | Doubtful<br>AMA-M2<br>pattern 1/40 | 71.4            | 51++        | 5 o                       | -        | -      | +++       | -       | Elevated | No                                     | PBC                                                                  | Positive anti-Sp100<br>autoantibodies                        |

|      |                                    |       |        |        |     |     |     |     |                                                    |                                               |                                           |                                                           |
|------|------------------------------------|-------|--------|--------|-----|-----|-----|-----|----------------------------------------------------|-----------------------------------------------|-------------------------------------------|-----------------------------------------------------------|
| A/17 | Doubtful<br>AMA-M2<br>pattern 1/80 | 89.6  | 94+++  | 6 o    | -   | -   | +++ | -   | Normal                                             | No (not follow-up and died)                   | Not PBC criteria                          | ANCA-MPO<br>vasculitis                                    |
| A/18 | Doubtful<br>AMA-M2<br>pattern 1/80 | 97    | 146+++ | 3 o    | -   | -   | +++ | -   | Elevated                                           | Yes (compatible with PBC)                     | PBC                                       |                                                           |
| A/19 | Doubtful<br>AMA-M2<br>pattern 1/80 | 70.4  | 60++   | 4 o    | +++ | -   | -   | +++ | Elevated                                           | Yes (compatible with PBC)                     | PBC                                       |                                                           |
| A/20 | 1/40                               | 23.4  | 21+    | 12 (+) | +   | -   | +   | -   | Elevated                                           | Yes (compatible with PBC)                     | PBC                                       |                                                           |
| A/21 | 1/40                               | 56.2  | 39++   | 4 o    | -   | -   | +   | -   | Normal                                             | No                                            | Not PBC criteria                          | Systemic lupus<br>erythematosus                           |
| A/22 | 1/160                              | 98.4  | 40++   | 1 o    | -   | -   | ++  | -   | Non<br>assessable<br>due to<br>clinical<br>context | No (lost to follow-up)                        | Not PBC criteria<br>(Alcoholic cirrhosis) |                                                           |
| A/23 | 1/160                              | 97.7  | 74+++  | 11 (+) | -   | -   | +++ | -   | Normal                                             | No                                            | Not PBC criteria                          |                                                           |
| A/24 | 1/160                              | 96.1  | 90+++  | 13 (+) | +   | -   | +++ | -   | Normal                                             | No (patient's refusal)                        | Not PBC criteria                          | Elevated GGT and<br>positive anti-Sp100<br>autoantibodies |
| B/1  | 1/320                              | 145.1 | 221+++ | 193+++ | +++ | +++ | +++ | ++  | Elevated                                           | Yes (compatible with PBC<br>and AIH)          | PBC + AIH                                 |                                                           |
| B/2  | 1/320                              | 162   | 226+++ | 211+++ | +++ | +++ | +++ | +++ | Elevated                                           | No                                            | PBC                                       |                                                           |
| B/3  | 1/320                              | 113.1 | 191+++ | 196+++ | +++ | +++ | ++  | -   | Elevated                                           | Yes (compatible with PBC)                     | PBC                                       |                                                           |
| B/4  | 1/320                              | 110.8 | 107+++ | 89+++  | ++  | ++  | ++  | -   | Normal                                             | No                                            | Not PBC criteria                          |                                                           |
| B/5  | 1/320                              | 116.7 | 213+++ | 219+++ | +++ | +++ | +++ | -   | Normal                                             | Yes (severe steatosis)                        | Not PBC criteria                          | Positive anti-Sp100<br>autoantibodies                     |
| B/6  | 1/320                              | 159.8 | 153+++ | 163+++ | ++  | +++ | +++ | -   | Normal                                             | Yes (compatible with PBC)                     | PBC                                       | Elevated GGT                                              |
| B/7  | 1/320                              | 157.8 | 208+++ | 185+++ | ++  | +++ | +++ | -   | Elevated                                           | Yes (compatible con PBC)                      | PBC                                       |                                                           |
| B/8  | 1/320                              | 100.8 | 156+++ | 173+++ | +++ | +++ | -   | ++  | Normal                                             | No                                            | Not PBC criteria                          |                                                           |
| B/9  | 1/640                              | 113.8 | 220+++ | 228+++ | +++ | +++ | +++ | -   | Elevated                                           | Yes (compatible with PBC<br>and probable AIH) | PBC + AIH                                 |                                                           |
| B/10 | 1/640                              | 116.7 | 209+++ | 213+++ | +++ | +++ | -   | -   | Elevated                                           | Yes (compatible with PBC<br>and AIH)          | PBC + AIH                                 |                                                           |

DB-E2nonSep: DB with non-separated three E2 subunits; DB-E2sep: DB with separated three E2 subunits; o: negative; (+) (6-10): doubtful; + (11-25): weak positive; ++ (26-50): moderate positive; +++ (>50): positive; ALP: Alkaline Phosphatase; PBC: Primary biliary cholangitis; AIH: Autoimmune hepatitis; MAFLD: Metabolic dysfunction-associated fatty liver disease.
